# Supplementary material
Source: publisher site journal article supplement (https://www.dovepress.com/article/222224)
Supplement: Supplementary file 1 [file get_supplementary_file.php]

浙江中医药大学附属第二医院医学伦理委员会  
科研项目申报伦理审查意见

尊敬的 赵阳春 (研究者):

您提交的 B7-H3 通过 PI3k/AKT/BCL2 诱导卵巢癌肿瘤干性与耐药研究 的研究方案、知情同意书已经被浙江中医药大学附属第二医院伦理委员会预审查, 伦理审查号为 XH20160213。

审查结果为 同意申报, 具体意见: 该项目符合《设计人的生物医学研究伦理审查办法》(2016) 及赫尔辛基宣言关于涉及人体或人体标本的临床研究的相关规定, 对受试者保护得当, 保证了个人信息的安全, 同意申报。项目批准立项后, 研究者必须将正式研究方案及知情同意书等提交伦理委员会审查, 在伦理委员会同意并出具伦理批件后, 该项目方可开展实施。

浙江中医药大学附属第二医院  
伦理委员会

2016年9月1日

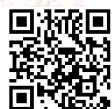

扫描全能王 创建

浙江中医药大学附属第二医院医学伦理委员会

科研项目申报伦理审查意见

**Review on the Declaration of Scientific Research Projects by  
Ethics Committee in the Second Affiliated Hospital of Zhejiang  
Chinese Medical University**

尊敬的 赵阳春 (研究者):

您提交的 B7-H3 通过 PI3k/AKT/BCL2 诱导卵巢癌肿瘤干性与耐药研究 的研究方案、知情同意书已经被浙江中医药大学附属第二医院伦理委员会预审查，伦理审查号为 XH20160213。

Dear Zhao Yangchun (Researcher):

Your study program and patients informed consent in B7-H3 induces ovarian cancer drugs resistance through an PI3K/AKT/BCL-2 signaling pathway project has been pre-examined by the Ethics Committee the Second Affiliated Hospital of Zhejiang Chinese Medical University. The ethical review number was XH20160213.

审查结果为 同意申报，具体意见：该项目符合《设计人的生物医学研究伦理审查办法》（2016）及赫尔辛基宣言关于涉及人体或人体标本的临床研究的相关规定，对受试者保护得当，保证了个人信息的安全，同意申报。项目批准立项后，研究者必须将正式研究方案及知情同意书等提交伦理委员会审查，在伦理委员会同意并出具伦理批件后，该项目方可开展实施。

The results of the review are approved. Specific opinion: the project is in line with the "Designer's Ethical Review Measures for Biomedical Research" (2016) and the Helsinki Declaration on clinical research involving human or human specimens, the subjects are properly protected, to ensure the safety of personal information, consent to the declaration. After the project is approved, the researcher must submit the formal research program and informed consent to the ethics committee for review, and the project can not be implemented until the ethics committee agrees and issues the ethical approval.

浙江中医药大学附属第二医院

伦理委员会

2016年9月1日

Ethics Committee in the Second Affiliated Hospital of Zhejiang

Chinese Medical University

2016 9 1
